# Supplementary material
Source: PubMed Central journal article supplement (PMC2702454)
Supplement: supp_212_13_2075__1.pdf [file supp_212_13_2075__1.pdf]

Table S1. Primers sequences used for quantitative PCR

| Primer name                              | Forward sequence                     | Reverse sequence                  |
|------------------------------------------|--------------------------------------|-----------------------------------|
| 18S Ribosomal RNA                        | 5'-TCTCAGTGCAAGCCGAAGTAGGT-3'        | 5'-TCCCTTCCATTGCTGGTTCGAGATT-3'   |
| Hsp90                                    | 5'-AACTGCCCTCCTATCTTCTGGCTT-3'       | 5'-TCTTACACCTTCCCTGCGCATCATCT-3'  |
| Endoplasmin                              | 5'-GGACAGTTTGGCGTTGGCCTTTAT-3'       | 5'-CAAGGTATTACCACGTGGGTCTTCAG-3'  |
| Hsp20.7                                  | 5'-CTCAACAGTCTTCTCAACATTCTTCTTAGG-3' | 5'-AGGAACGTCCAATCCAATCATCC-3'     |
| Hsp70                                    | 5'-ACTCCACACACAGGATATGTGGTT-3'       | 5-GTGAACGAAACAAGAGTGC GGAGAA-3'   |
| ATP citrate lyase                        | 5'-ACTGCTGATCATGGACCTGCTGTA-3'       | 5'-AGCACCATCTAGAGCACCACCAA-3'     |
| Cathpesin-like protease                  | 5'-AGCATGATCCGCAAGATCCCTGAT-3'       | 5'-CATTTCATCGGCTGATGGGTGTTCA-3'   |
| Translation elongation factor-1 $\gamma$ | 5'-AAGGCTGGAACCTTTCCAAGAGGA-3'       | 5'-AGGTGCTCATTGCTGCCTCTTACT-3'    |
| Cytochrome p450                          | 5'-GGACTTGGGTGTTAAGTTAAGCCAG-3'      | 5'-ATCACGGGCAGCGTCATCAAAGTA-3'    |
| Histone 2A                               | 5'-TAGACCCGGATGTTGACCCTGTTT-3'       | 5'-ATTGGAGTTAGCTGGCAATGCTGC-3'    |
| Desaturase                               | 5'-ATGGCCTCTGCGACTTCTATTGGT-3'       | 5'-TTGTGTGGATCGGCATCAGTCTCA-3'    |
| CHORD containing protein                 | 5'-TAAGGGCTGCACAAGTTCGTATCA-3'       | 5'-CCTTGACAATTGCTGCAGGTGCTT-3'    |
| Bax Inhibitor                            | 5'-CTTCAGCCTCTGCGTTTACGCTTT-3'       | 5'-ATCGAGAAGCGTCAAGTGGTGAT-3'     |
| RACK1                                    | 5'-TCTCTTCCAGCGTGGCCATTAGA-3'        | 5'-CCTCGAAGCTGTAGAGATTCCGACAT-3'  |
| Nedd8                                    | 5'-GGAGGATCGGCTTCTTCATTGGT-3'        | 5'-AGCATAGGCAATCTGAGCAGCTA-3'     |
| CG1532-PA/glyoxalase                     | 5'-GGATGGCCCTTTACTGAAGAAGGA-3'       | 5'-TGCAGGTAGCTGAGGTTCAATTT-3'     |
| Mitochondrial processing peptidase       | 5'-ATACAACAGGACGGGCTTCCAAGT-3'       | 5'-GGCTGGCAAAGTTGGAGATGTTGA-3'    |
| Translation initiation factor 4          | 5'-AAAGCCTGGGTCTGTGTGATGAGA-3'       | 5'-TGAGATCCTTGAGGAGCGTGGTTT-3'    |
| IFRD                                     | 5'-ATCAGGTGGCTCTCCATCCTCAAT-3'       | 5'-AGAGGACATGACTCCTCAGTTGGT-3'    |
| TIF                                      | 5'-GGTCTGTGTGATGAGACGGATCCAAA-3'     | 5'-TGAGATCCTTGAGGAGCGTGGTTT-3'    |
| TFDp2                                    | 5'-CAGTCTGCTGAGTAGGAGTTAAGCGT-3'     | 5'-TCCATTTCACTCACCTGGTGGAAAC-3'   |
| RpL45                                    | 5'-AGTCGGCGGAGATCTATTGCATGT-3'       | 5'-GGATTCCAGTGTTCGAGCCTCTT-3'     |
| eEFtB- $\gamma$                          | 5'-AAGGCTGGAACCTTTCCAAGAGGA-3'       | 5'-AGGTGCTCATTGCTGCCTCTTACT-3'    |
| Spaghetti squash                         | 5'-GGAAATGAGGGCAGTAAGGCACTA-3'       | 5'-ATCGTGAAGCTCCAATCAAGGGTG-3'    |
| CHORD containing protein                 | 5'-TAAGGGCTGCACAAGTTCGTATCA-3'       | 5'-CCTTGACAATTGCTGCAGGTGCTT-3'    |
| COX subunit II                           | 5'-TTCCGTCTTCTCGATGTTGACAACCG-3'     | 5'-CGTCTGGTGTAGCATCAGATTTAACCC-3' |
| COX subunit IV                           | 5'-TGCCCGAATCCTTTACTGATGAGC-3'       | 5'-CCCCTGGATGTCAATCCATCAAC-3'     |
| COX subunit VII                          | 5'-TTCTTGGAGTGCTGTGGACATCA-3'        | 5'-TGGCTCTGGGTTTAGTGCTTCTCTT-3'   |
| Arginine kinase                          | 5'-TGCTTCTGTGCACATCAAGGTTCC-3'       | 5'-AAACTCCACCTCAGCTTCTGTGT-3'     |
| NPC2                                     | 5'-TCATATGTTTCCAATGTGCCAGCAAG-3'     | 5'-AGCTATTTCTTCCCTGGCACTGAC-3'    |
| RpL35                                    | 5'-TCCACTTGGTTGGTGTGAGGTCT-3'        | 5'-AGATGTTGCATCTACGTCGGCCAT-3'    |
| Reptin                                   | 5'-GCCATCTCATTCTCCAGAGCACGATT-3'     | 5'-TGAGTGGCGTGAAGAAGGGAAAG-3'     |
| Aldo-keto reductase                      | 5'-AGGCCCATGGAGGAACAAGTGAAT-3'       | 5'-GCCACAACTGTAATGCCCAAACG-3'     |
| Polymerase III                           | 5'-ATGGACAGAAAGGTGTTACAGGGC-3'       | 5'-TGATCCACCAATGCTGTCCCA-3'       |
| Pyroline carboxylate reductase           | 5'-TCTCCAATTCTACGGAGCGCTTT-3'        | 5'-TGGTATTGAAACAGGCAAGCACC-3'     |
| Male sterility protein                   | 5'-GGTCCGGCGATACCTCAATAAGA-3'        | 5'-TATACTATCACGGGCACCCAAGCA-3'    |
| Lipid metabolism                         | 5'-AAGACGTGTCCAGGGCTTATCGTA-3'       | 5'-TGTCGGCTGCCATTATGACTACCT-3'    |
